# Supplementary material for: Molecular Dynamics Simulation of Self-Assembly Processes of Diphenylalanine Peptide Nanotubes and Determination of Their Chirality
Source: Nanomaterials (Basel). 2023 Jun 21;13(13):1905. doi: 10.3390/nano13131905 (PMC10343799; doi:10.3390/nano13131905)
Supplement: Supplementary file 1 [file nanomaterials-13-01905-s001.zip › nanomaterials-2424985-supplementary.pdf]

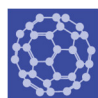

Supplementary Materials

# Molecular Dynamics Simulation of Self-Assembly Processes of Diphenylalanine Peptide Nanotubes and Determination of Their Chirality

Vladimir Bystrov \*, Ilya Likhachev, Sergey Filippov and Ekaterina Paramonova

Institute of Mathematical Problems of Biology—Branch of Keldysh Institute of Applied Mathematics, RAS, 142290 Pushchino, Russia; ilya\_lihachev@mail.ru (I.L.); fsv141@mail.ru (S.F.); ekatp11@gmail.com (E.P.)

\* Correspondence: vsbys@mail.ru or bystrov@impb.ru.

Colour images for visual differential analysis (VDA)

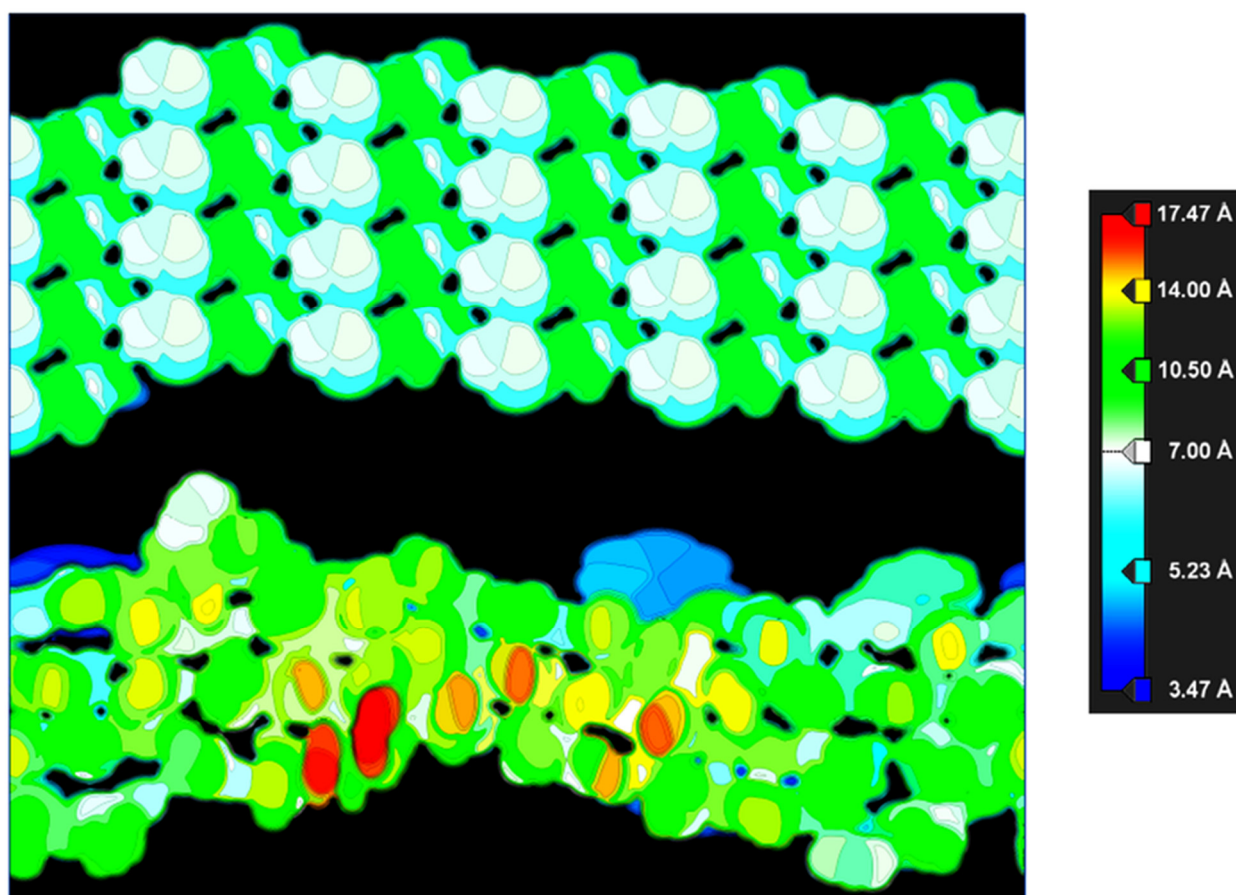

**Figure S1.** Parallel representation of hypsometric maps of the outer surface of self-assembled nanotubes with chirality D, obtained in the course of natural (top) and MDS numerical (bottom) experiments.

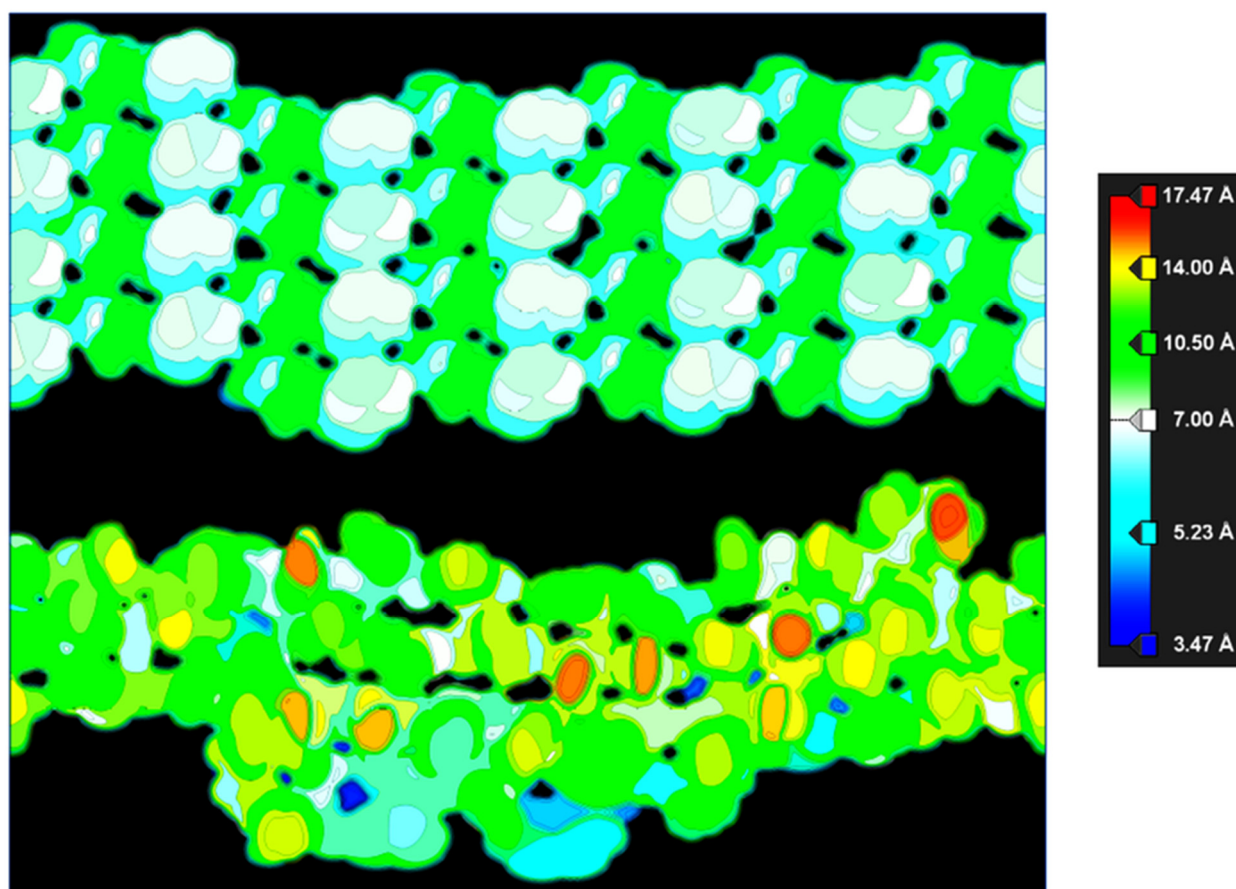

**Figure S2.** Parallel representation of hypsometric maps of the outer surface of self-assembled nanotubes with chirality L, obtained in the course of natural (top) and MDS numerical (bottom) experiments.

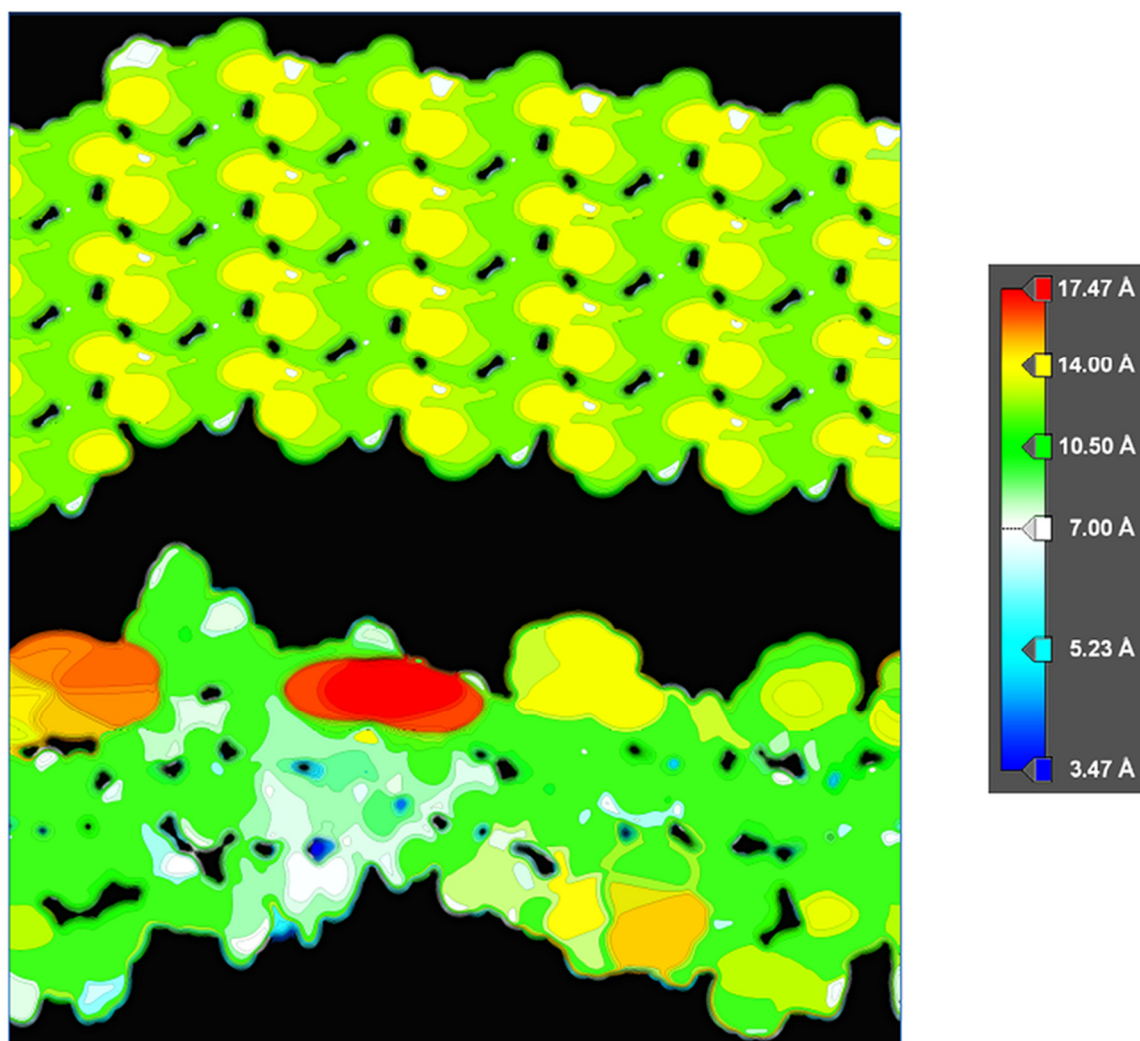

**Figure S3.** Parallel representation of hypsometric maps of the inner surface of the channels of self-assembled nanotubes with chirality D, obtained in the course of natural (top) and MDS numerical (bottom) experiments.

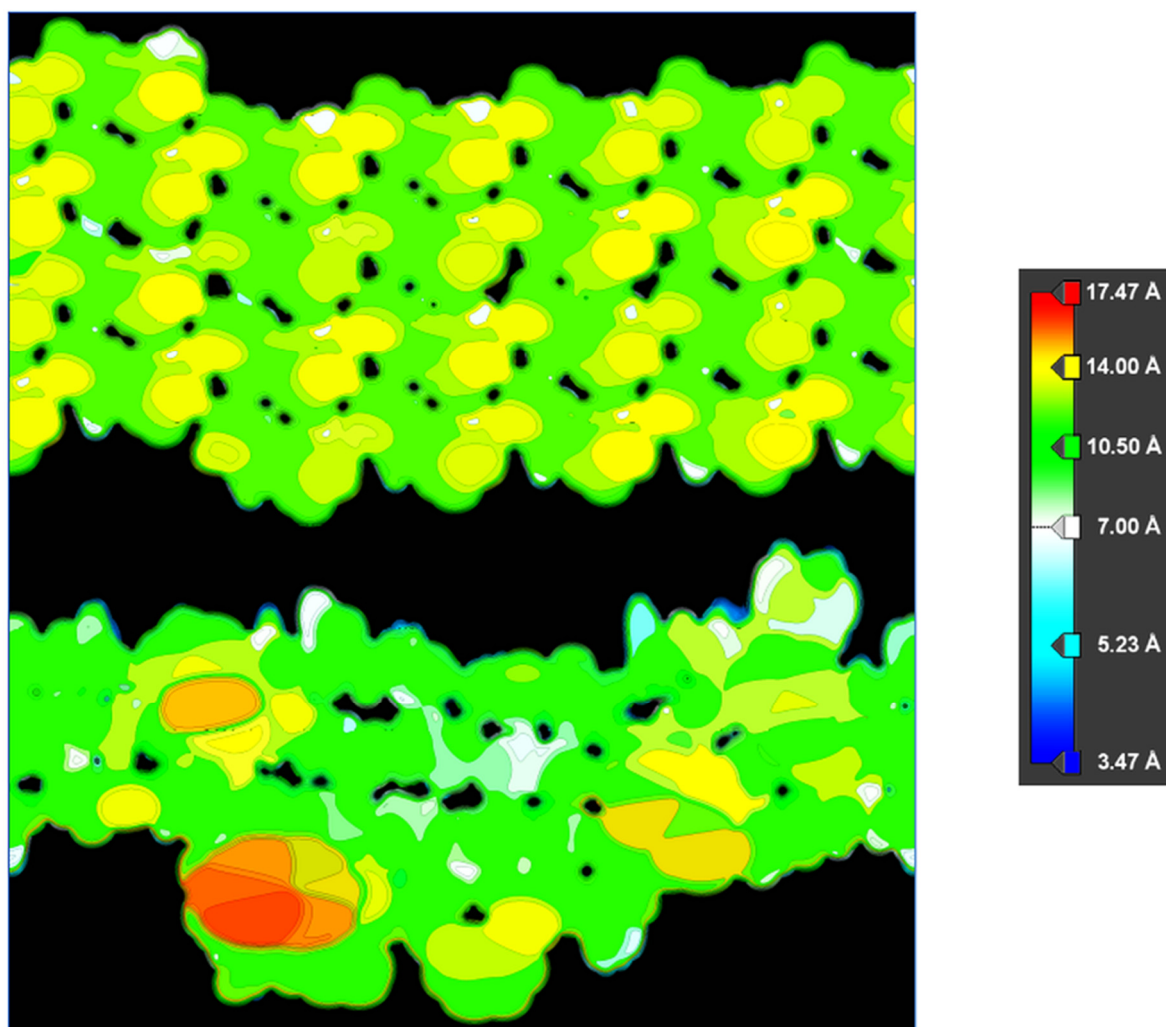

**Figure S4.** Parallel representation of hypsometric maps of the inner surface of the channels of self-assembled nanotubes with chirality L, obtained in the course of natural (top) and MDS numerical (bottom) experiments.
